# Supplementary material for: NLRP13 mutation as a predictive indicator for immune checkpoint inhibitor efficacy in melanoma and NSCLC
Source: Research Square preprint supplement (doi:10.21203/rs.3.rs-7155327/v1), 2025-07-31
Supplement: Supplementary file 1 [file 2ec4f2e522ae65f80cccbb3b.docx]

**
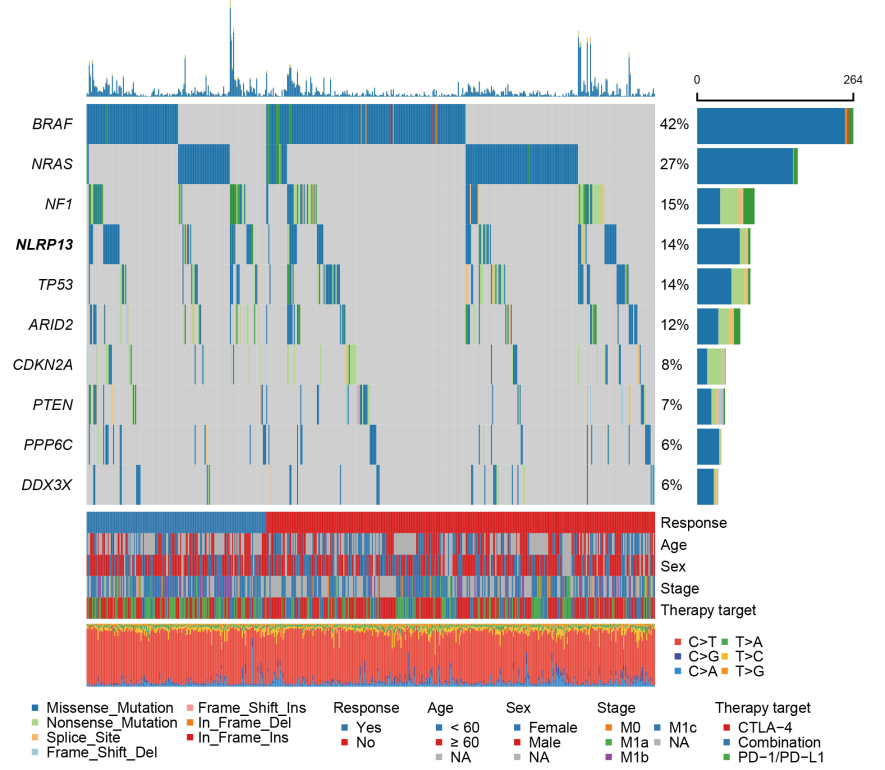
Supplementary Figures**

**Figure S1.** Mutational patterns of *NLRP13* and common melanoma driver genes illustrated with waterfall plot.

**
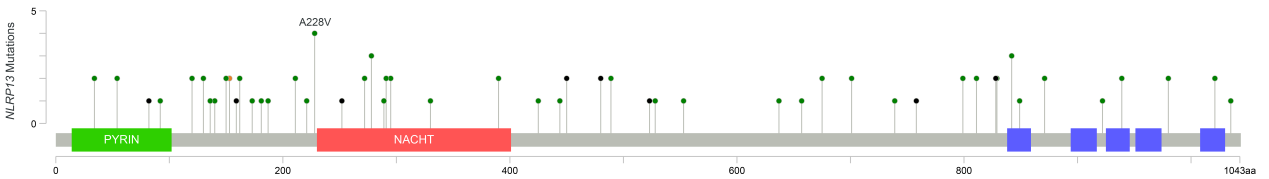
**

**Figure S2.** Detailed amino acid changes induced by *NLRP13* mutations in the integrated melanoma cohort.

**
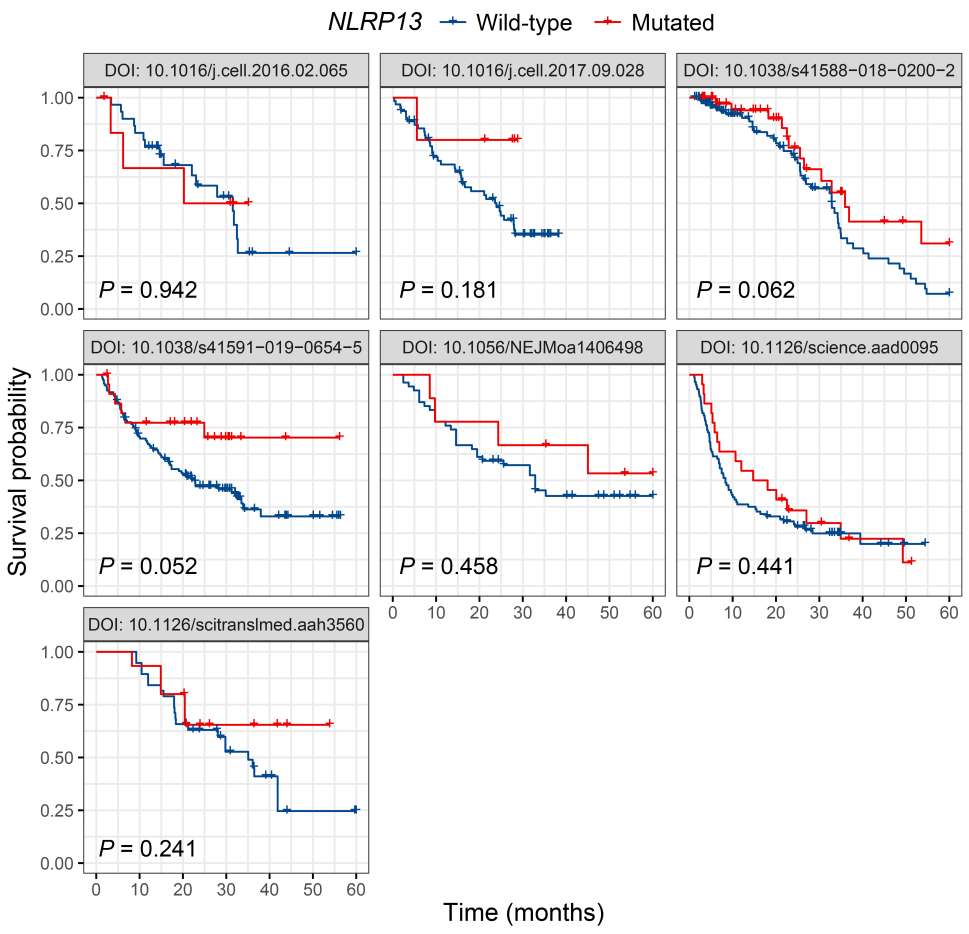
Figure S3.** Kaplan-Meier survival analyses of *NLRP13* mutations in individual ICI-treated melanoma cohorts.


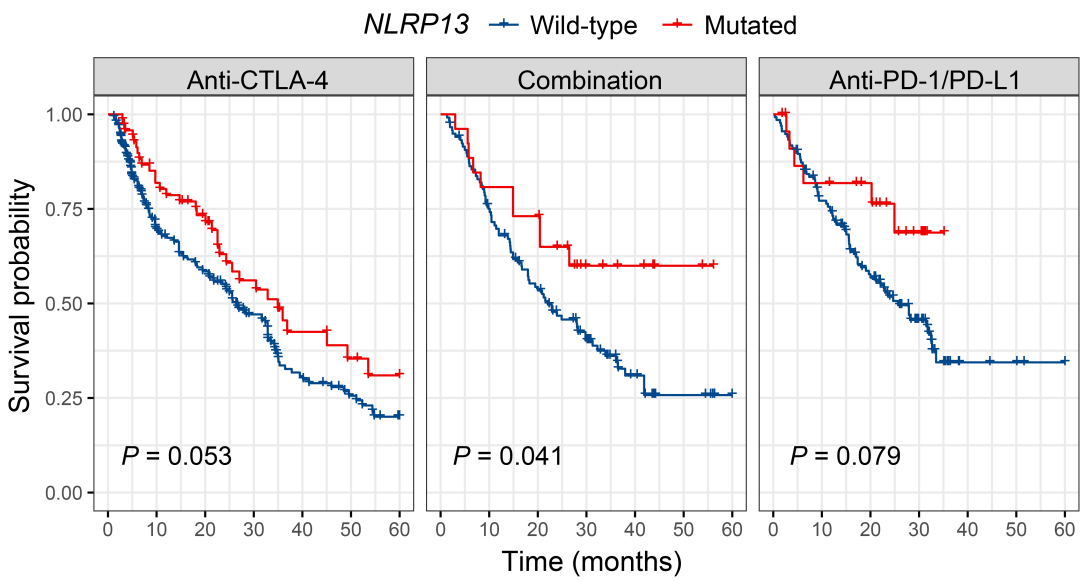


**Figure S4.** Kaplan-Meier survival analyses of *NLRP13* mutations in distinct ICI treatment types in melanoma.

**
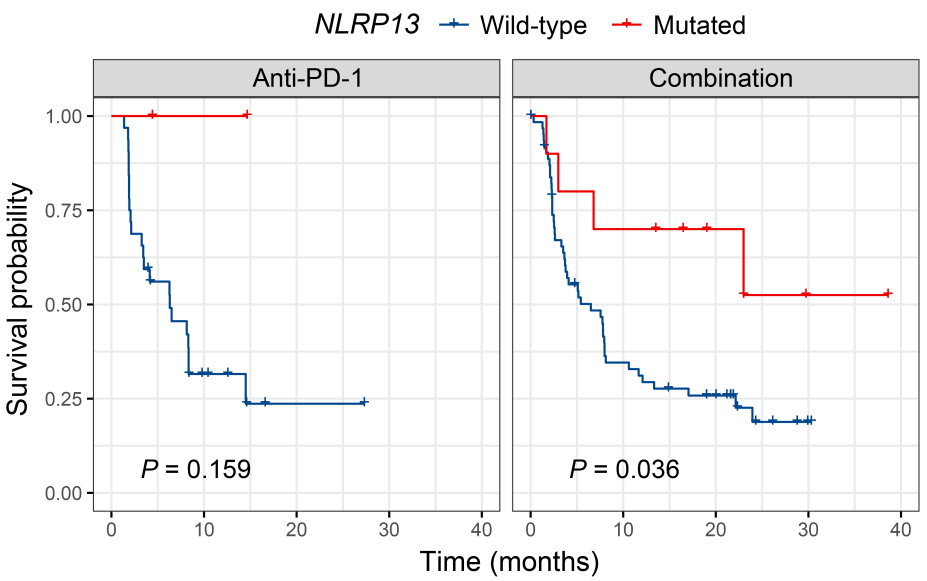
Figure S5.** Kaplan-Meier survival analyses of *NLRP13* mutations in individual ICI-treated NSCLC cohorts.

**
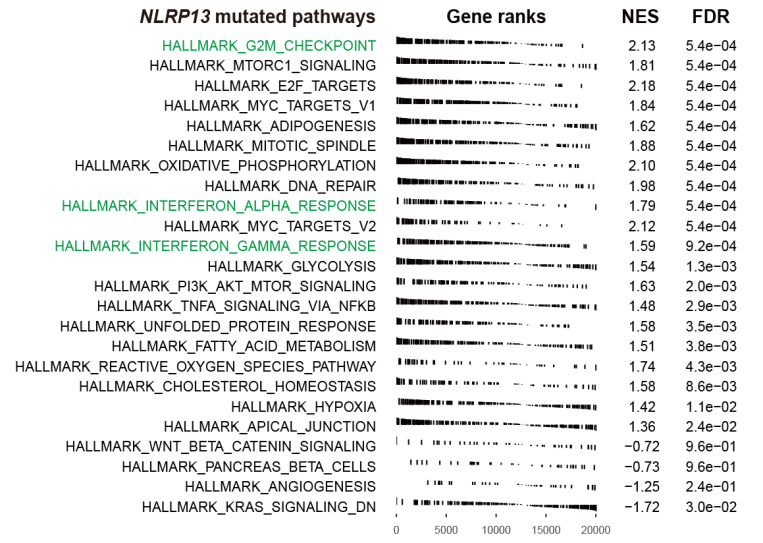
**

**Figure S6.** Significantly enriched signaling pathways in *NLRP13* mutated subgroups in melanoma. Immune response pathways were highlighted with green.

**
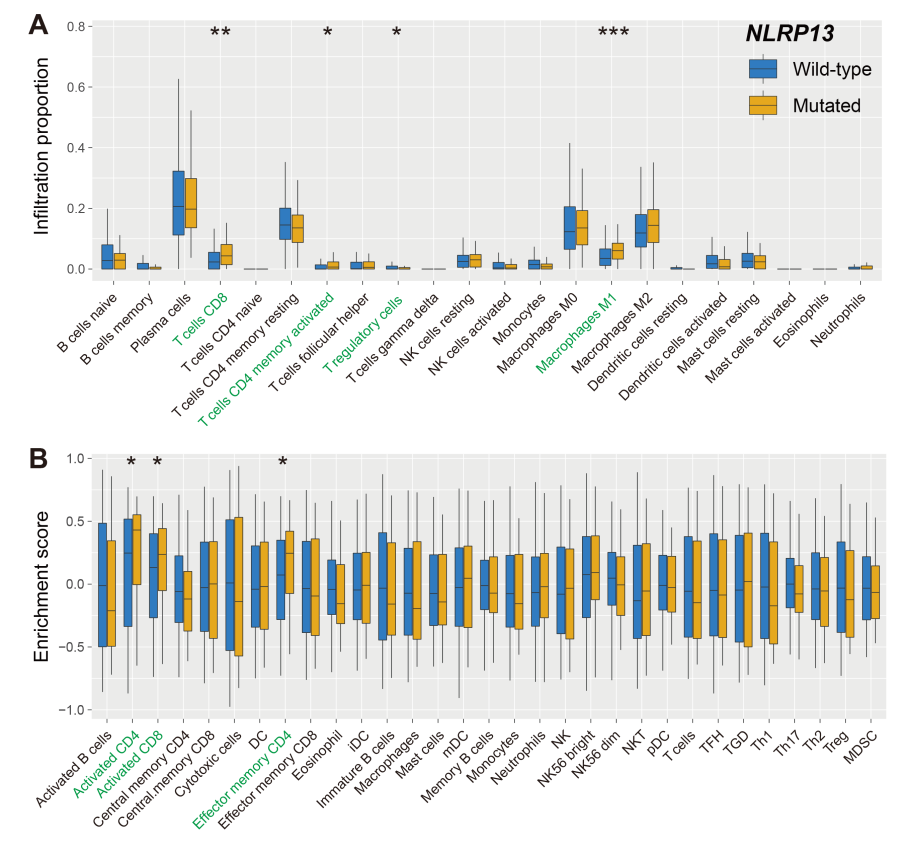
Figure S7.** Immune infiltration associated with *NLRP13* mutations in NSCLC. (A) Distinct infiltration of 22 immunocytes of *NLRP13* mutated and wild-type groups evaluated with CIBERSORT algorithm. Immunocytes highlighted with green are significantly differentially infiltrated. (B) Distinct infiltration of 31 immunocytes of *NLRP13* two groups evaluated with Angelova *et al.* method.

**
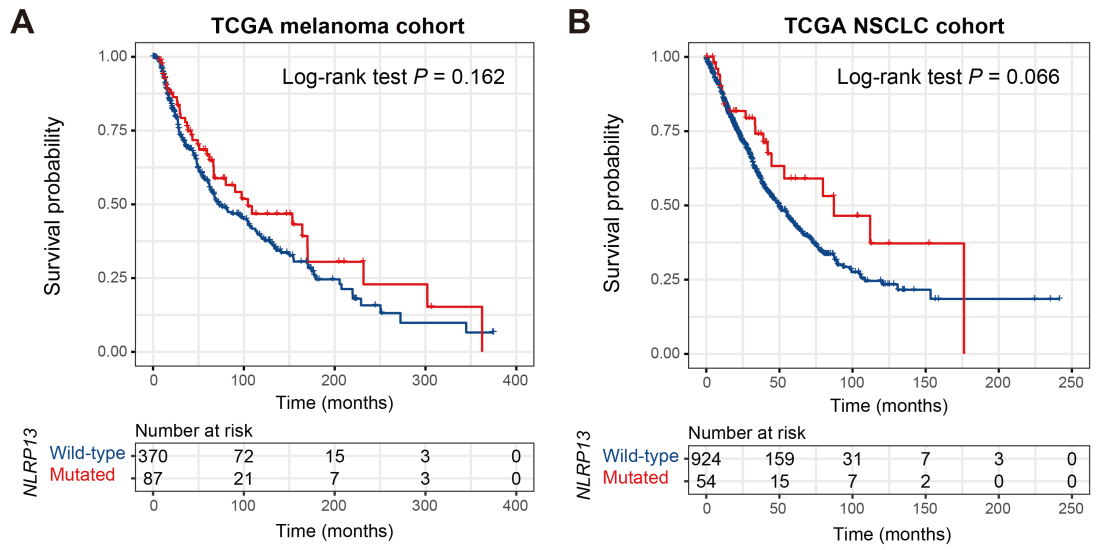
Figure S8.** Prognostic capacities of *NLRP13* mutations in (A) melanoma and (B) NSCLC patients derived from the TCGA project.
